# Supplementary material for: Facile preparation of hierarchical MgCo2O4/MgCo2O4 nanochain array composites on Ni foam as advanced electrode materials for supercapacitors
Source: Royal Society of Chemistry journal article supplement (doi:10.1039/c9nj06318h), 2020-01-01
Supplement: c9nj06318h1.pdf [file c9nj06318h1.pdf]

**Electronic Supplementary Information**

**Facile preparation of hierarchical MgCo<sub>2</sub>O<sub>4</sub>/MgCo<sub>2</sub>O<sub>4</sub> nanochain arrays  
composites on Ni foam as advanced electrode materials for supercapacitors†**

**Yedluri Anil Kumar<sup>a</sup>, Saurabh Singh<sup>b</sup>, Prem Jyoti Singh Rana<sup>ac</sup>, Kulurumotlakatla Dasha  
Kumar<sup>a</sup> and Hee-Je Kim<sup>a\*</sup>**

<sup>a</sup>School of Electrical Engineering, Pusan National University, Busandaehak-ro 63beon-gil,  
Geumjeong-gu, Busan, 46241, Rep. of KOREA

<sup>b</sup>Department of Materials Science and Engineering, Pusan National University, Busan, Republic of  
Korea

<sup>c</sup>Energy Research Institute@Nanyang Technological University (ERI@N), Research Techno Plaza, X-  
Frontier Block Level 5, 50 Nanyang Drive, Singapore 637553, Singapore

**\*Corresponding Author**

E-mail: [heeje@pusan.ac.kr](mailto:heeje@pusan.ac.kr) (H.-J. Kim)

Tel: +82-10-2295-0613. Fax: +82 51 513 0212.

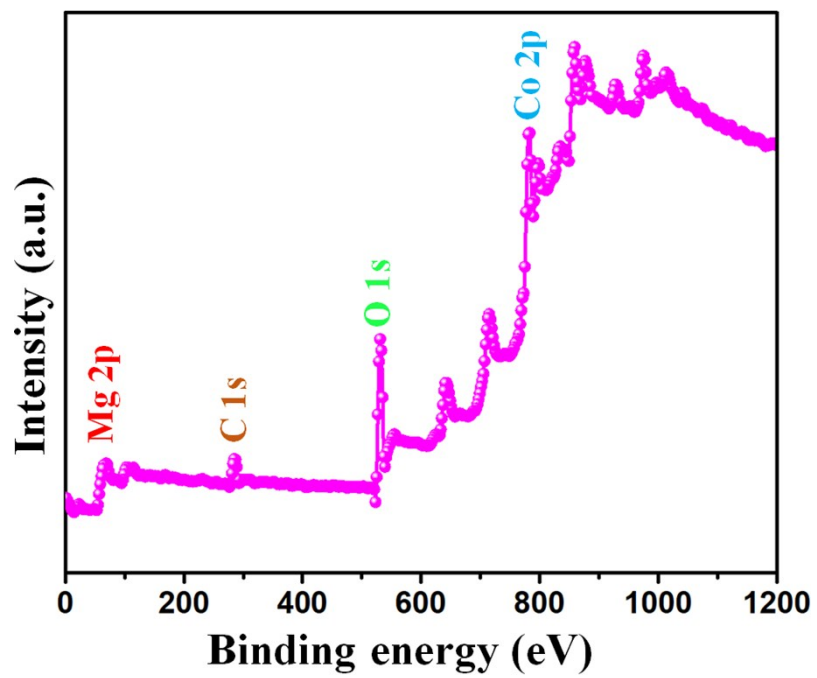

Fig. S1 XPS survey spectrum of MCO NFAs

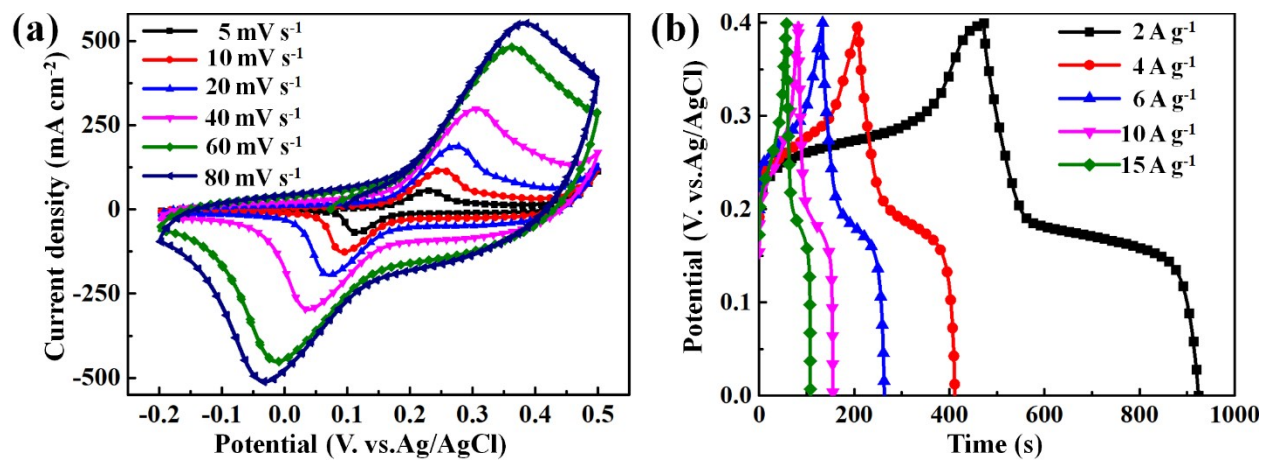

**Fig. S2** (a,b) CV and GCD curves of MCO NFAs electrode on nickel foam in 2 M KOH electrolyte solution.
